# Supplementary material for: Genetic diversity and structure in hill rice (Oryza sativa L.) landraces from the North-Eastern Himalayas of India
Source: PubMed Central journal article supplement (PMC4944464; doi:10.1186/s12863-016-0414-1), 2016-07-13
Supplement: 12863_2016_414_MOESM1_ESM.pdf [file 12863_2016_414_MOESM1_ESM.pdf]

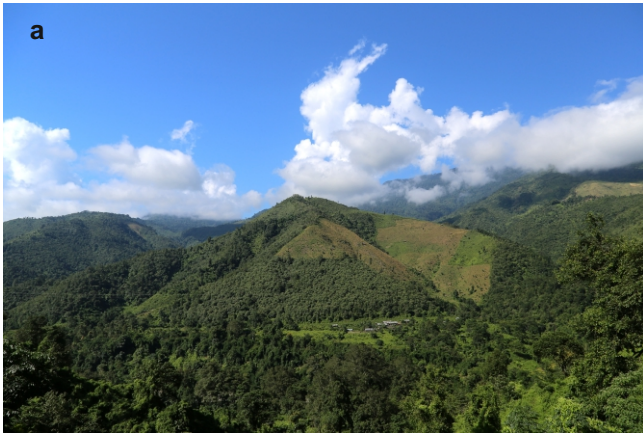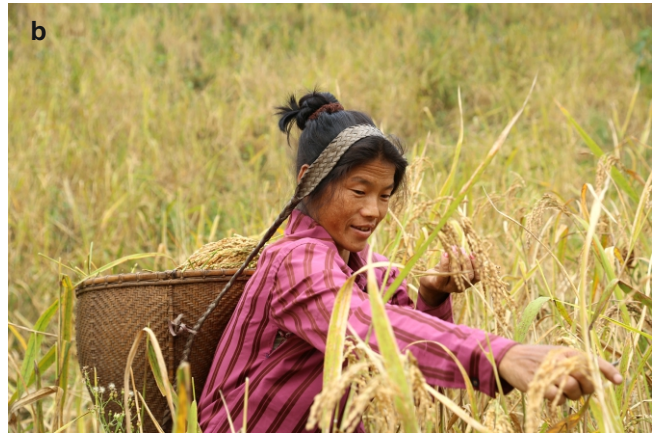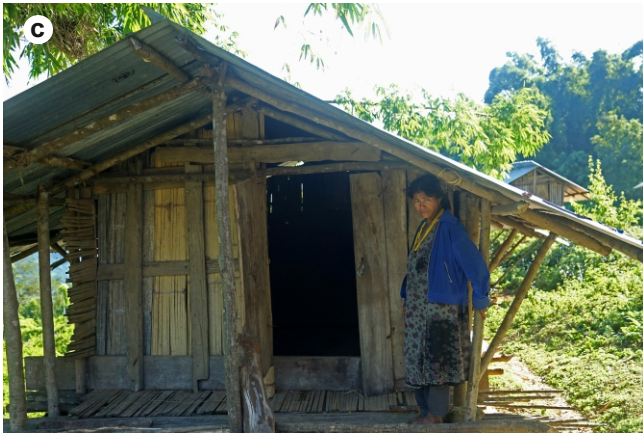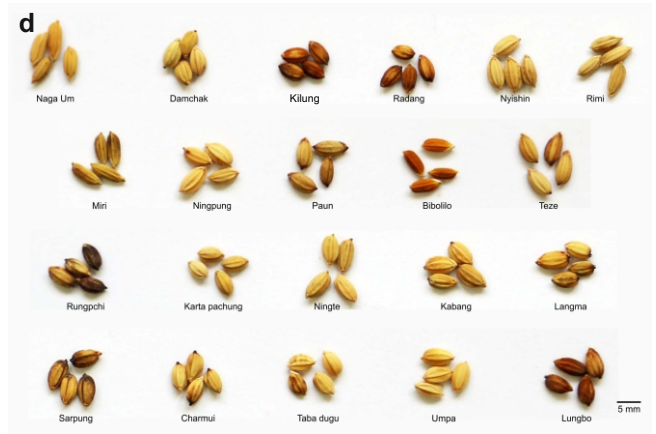

**Additional file 1:** Hill rice cultivation in the state of Arunachal Pradesh. **a** *Jhum* fields after rice harvesting; **b** Harvesting of hill rice by a lady of *Nyishi* community in Papum Pare district; **c** rice granary containing harvested and stored grain; **d** An overview of grain morphology of the hill rice accessions collected for the study
