# Supplementary material for: Genetic diversity and structure in hill rice (Oryza sativa L.) landraces from the North-Eastern Himalayas of India
Source: PubMed Central journal article supplement (PMC4944464; doi:10.1186/s12863-016-0414-1), 2016-07-13
Supplement: 12863_2016_414_MOESM6_ESM.pdf [file 12863_2016_414_MOESM6_ESM.pdf]

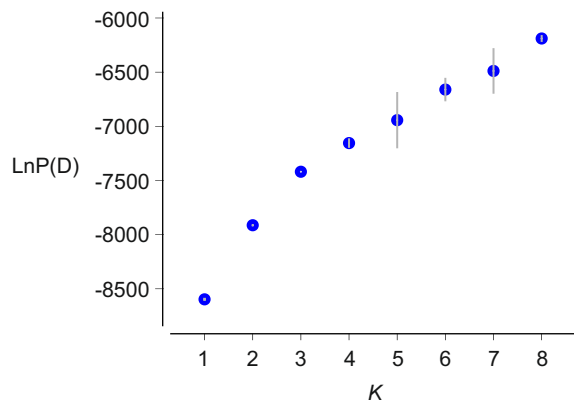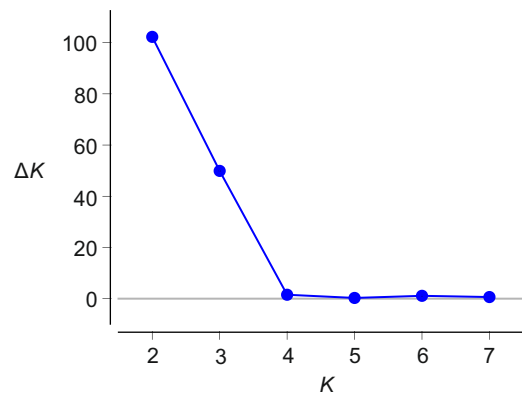

**Additional file 6:** Determination of the best  $K$  value(s) based on mean  $\text{LnP}(D)$  over five runs for each  $K$  value, and rate of change in the log probability of data between successive  $K$  values ( $\Delta K$ )
