# Supplementary material for: Genetic diversity and structure in hill rice (Oryza sativa L.) landraces from the North-Eastern Himalayas of India
Source: PubMed Central journal article supplement (PMC4944464; doi:10.1186/s12863-016-0414-1), 2016-07-13
Supplement: 12863_2016_414_MOESM9_ESM.pdf [file 12863_2016_414_MOESM9_ESM.pdf]

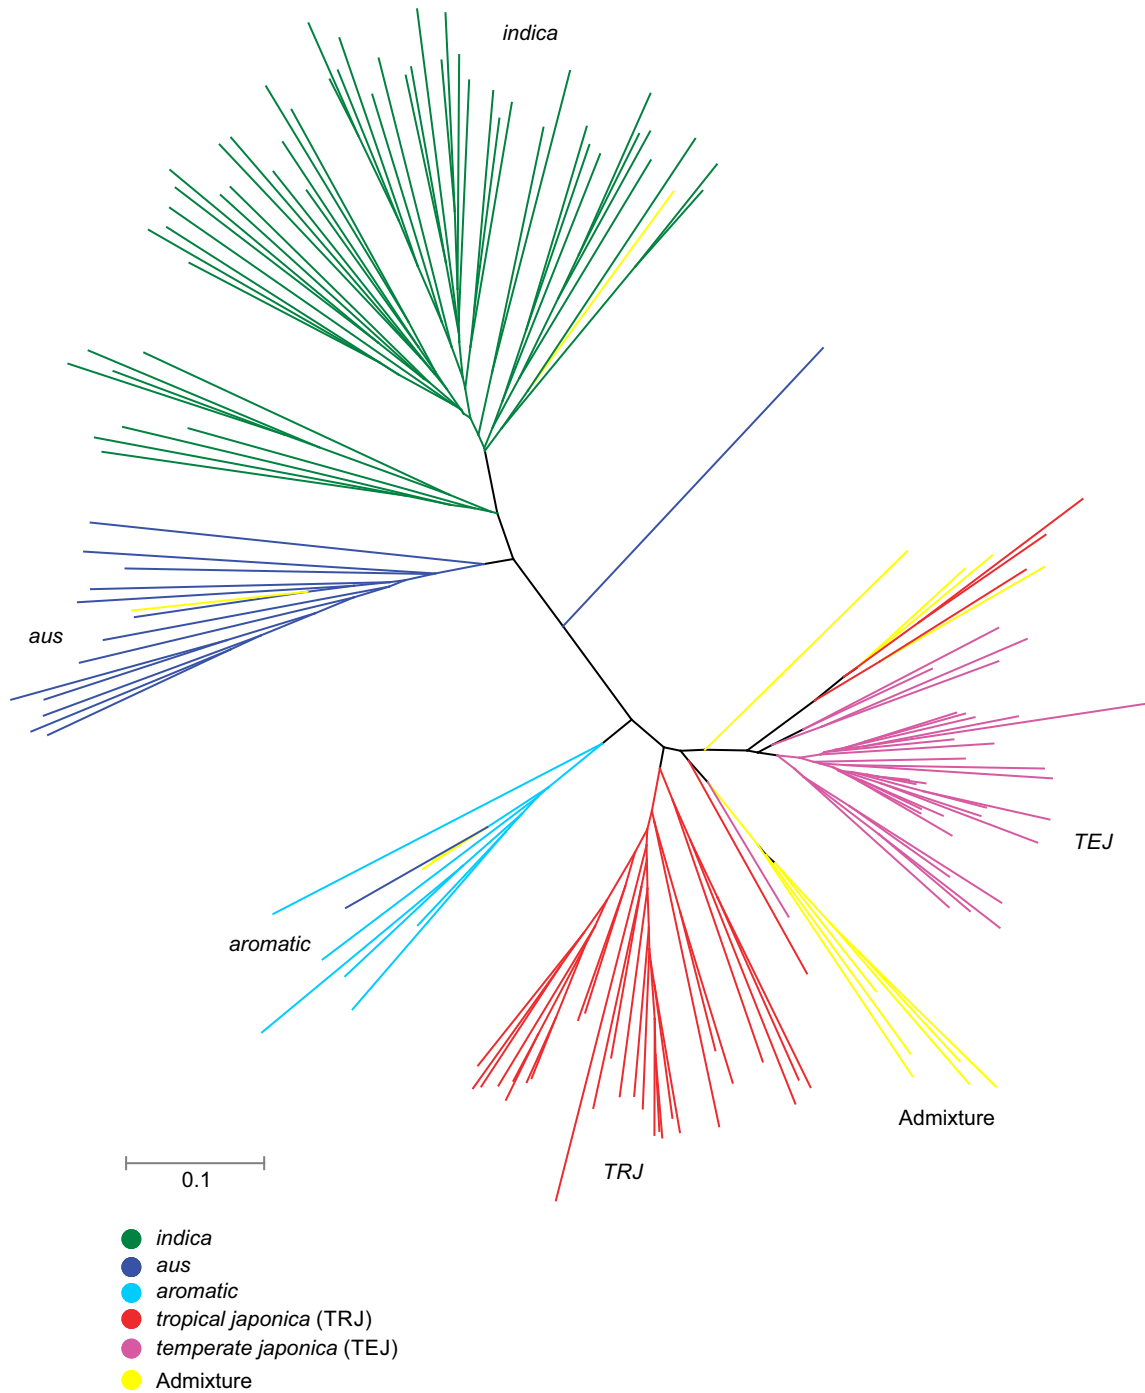

**Additional file 9:** Phylogenetic reconstruction of 150 reference rice accessions (Garris et al., 2005) based on 33 SSR markers data
